# Supplementary material for: Synergetic effect of dual co-catalysts on the activity of BiVO4 for photocatalytic carbamazepine degradation
Source: Royal Society of Chemistry journal article supplement (doi:10.1039/c9ra07152k), 2019-01-01
Supplement: c9ra07152k1.pdf [file c9ra07152k1.pdf]

## ***Supplementary Materials***

### **Synergetic effect of dual co-catalysts on the activity of BiVO<sub>4</sub> for photocatalytic carbamazepine degradation**

**Beibei Wang,<sup>a</sup> Ping Li,<sup>b</sup> Chunlei Du,<sup>b</sup> Yan Wang,<sup>b</sup> Daxin Gao,<sup>b</sup> Songtao Li,<sup>b</sup> Liying**

**Zhang<sup>b</sup> and Fuyu Wen<sup>b\*</sup>**

*<sup>a</sup> Educational Technology Center, Chengde Medical University, Chengde 067000, China*

*<sup>b</sup> Hebei Key Laboratory of Research and Development for Traditional Chinese Medicine,  
Chengde Medical University, Chengde 067000, China*

\* Corresponding author.

E-mail addresses: wenfuyu@vip.163.com (Fuyu Wen)

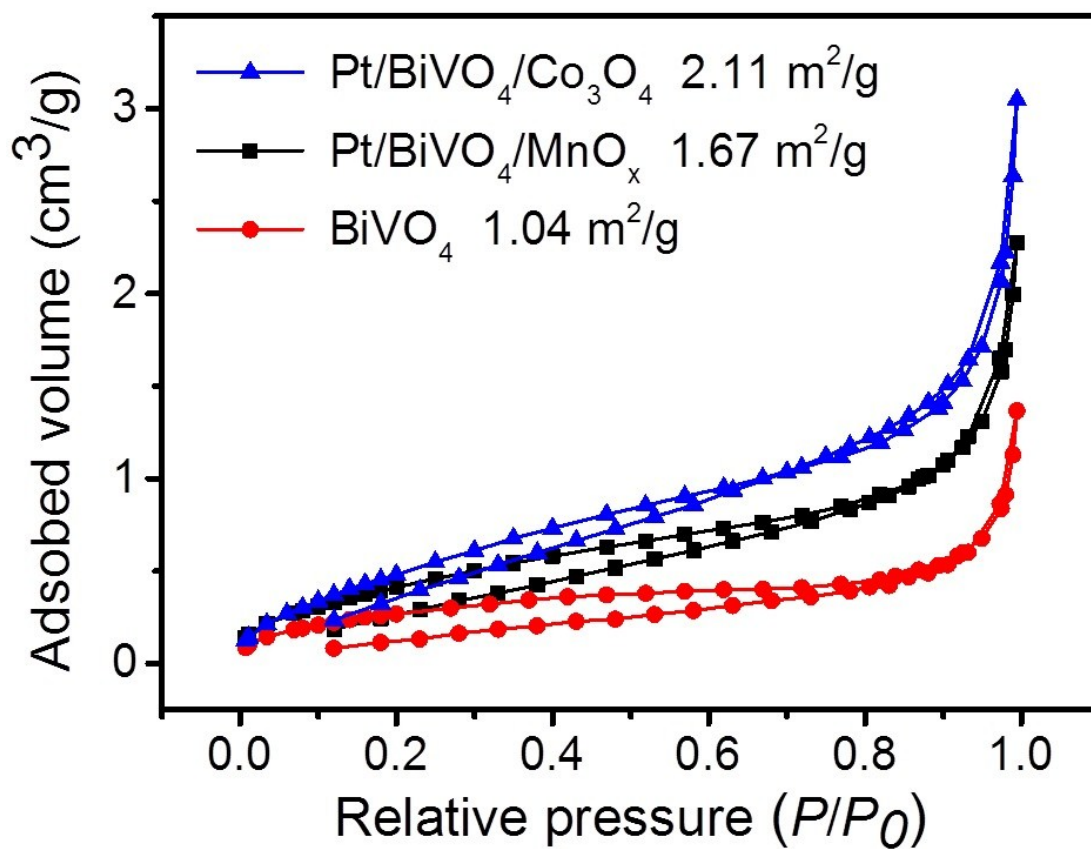

**Fig. S1.** N<sub>2</sub> adsorption and desorption isotherms of Pt/BiVO<sub>4</sub>/Co<sub>3</sub>O<sub>4</sub>, Pt/BiVO<sub>4</sub>/MnO<sub>x</sub> and BiVO<sub>4</sub>.

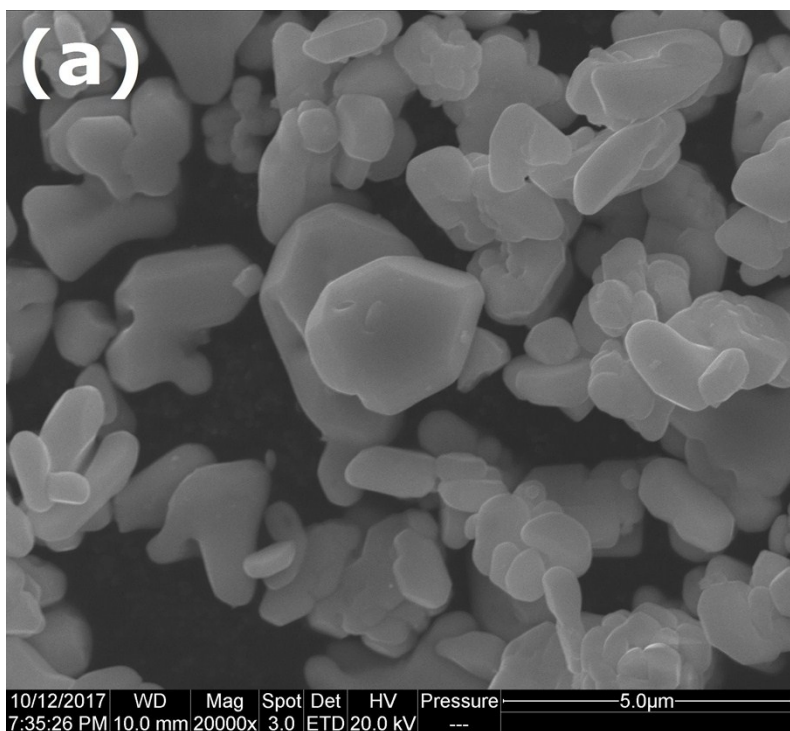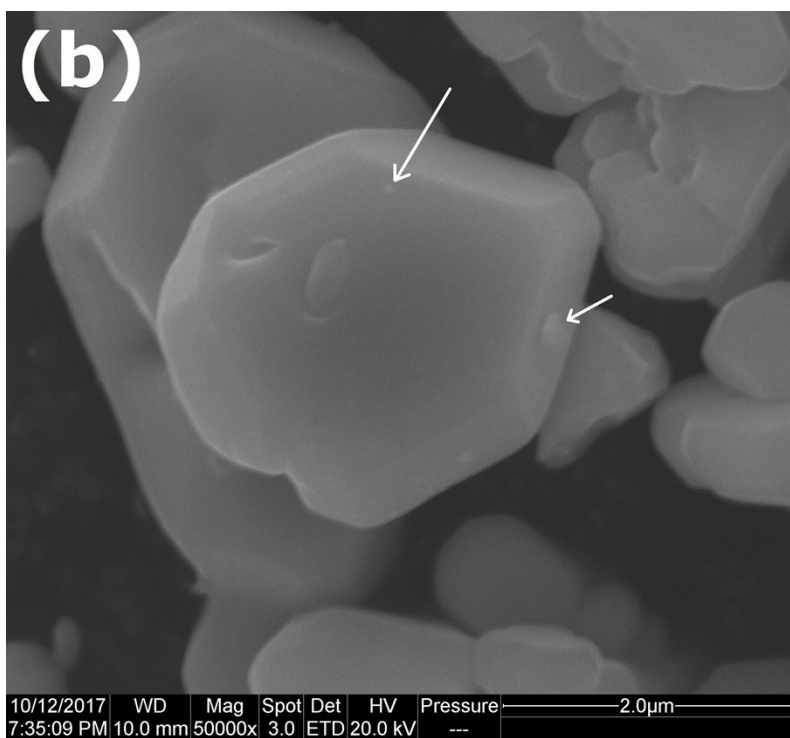

**Fig. S2.** SEM images of (a) prepared Pt/BiVO<sub>4</sub>/Co<sub>3</sub>O<sub>4</sub> and (b) Pt/BiVO<sub>4</sub>/Co<sub>3</sub>O<sub>4</sub> (enlarged). The contents of the deposited Pt and Co<sub>3</sub>O<sub>4</sub> are 0.2 wt% and 0.1 wt%, respectively.

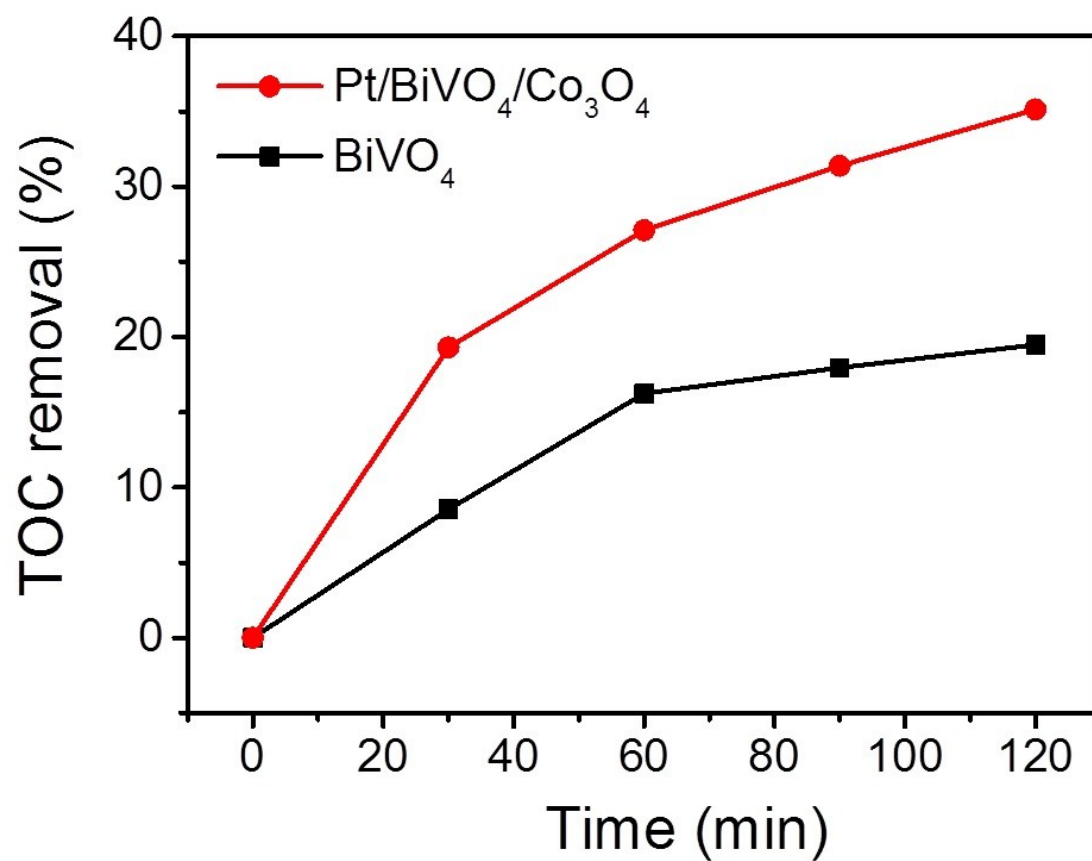

**Fig. S3.** TOC removal of CBZ in the presence of Pt/BiVO<sub>4</sub>/Co<sub>3</sub>O<sub>4</sub> and BiVO<sub>4</sub> photocatalysts after 60 min of visible light irradiation.

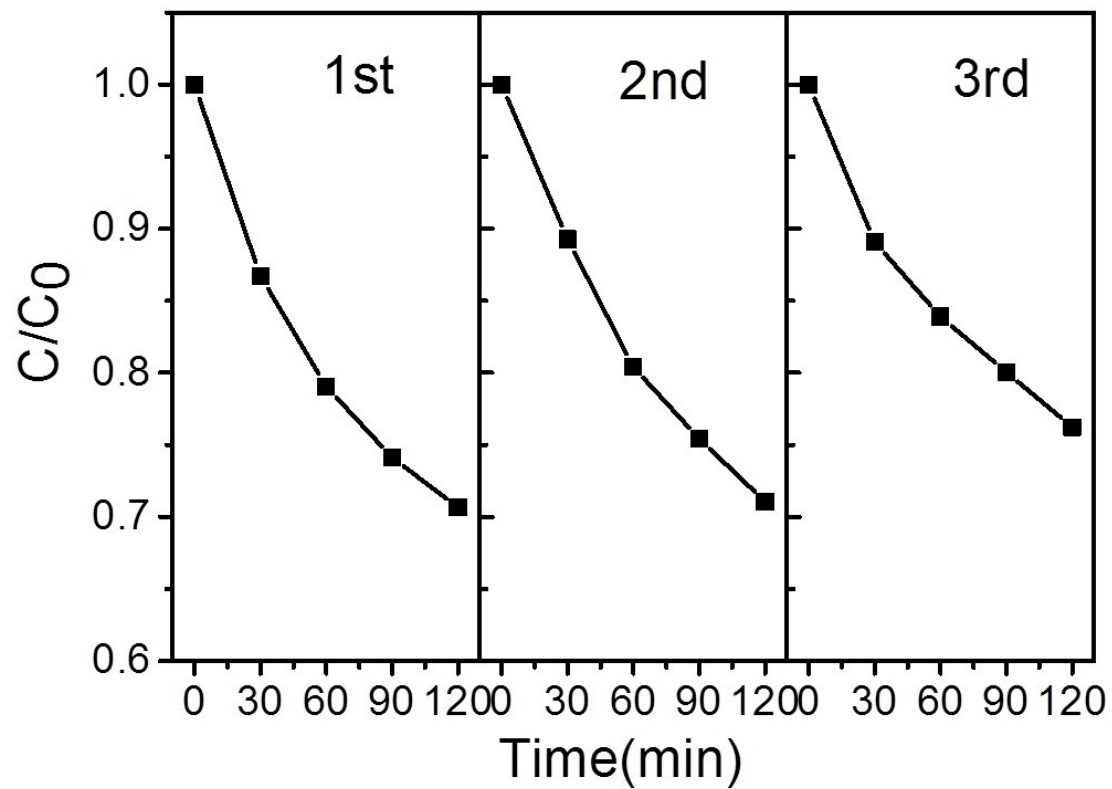

**Fig. S4.** Cycling runs in the photocatalytic activity of Pt/BiVO<sub>4</sub>/Co<sub>3</sub>O<sub>4</sub> photocatalyst under the visible light irradiation.

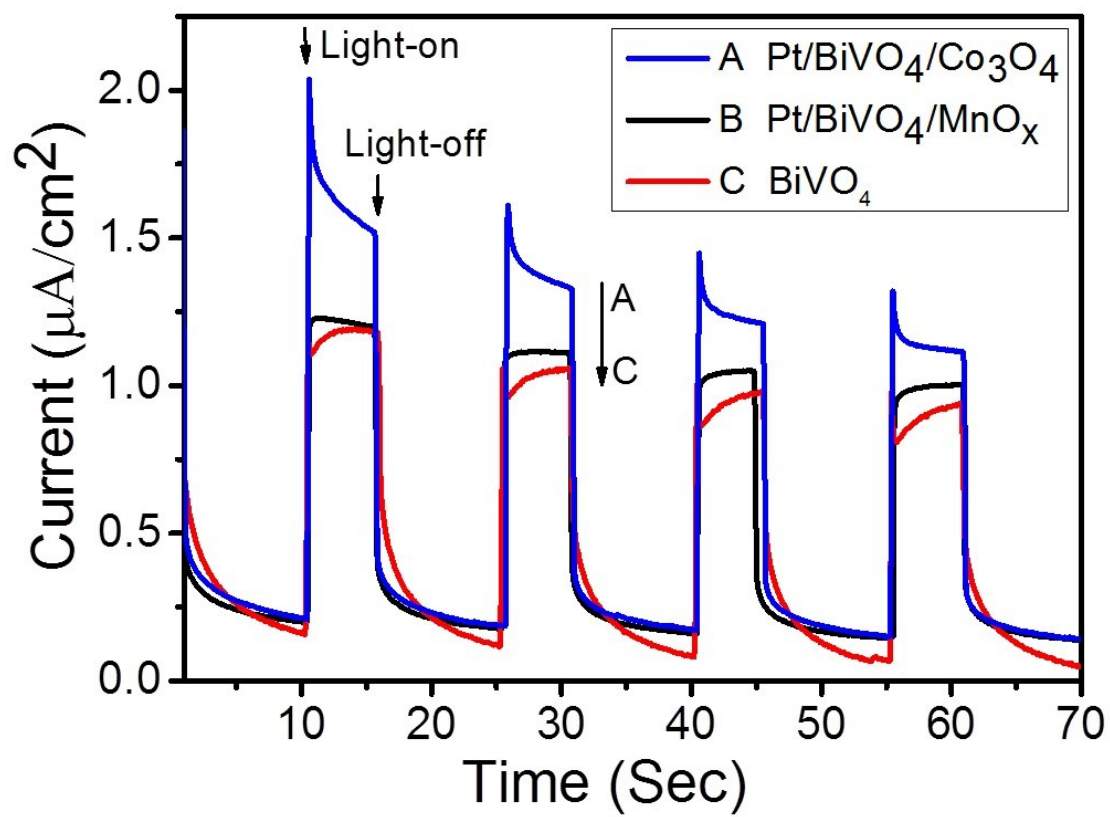

**Fig. S5.** Transient photocurrent responses of different photocatalysts under visible light irradiation ( $\lambda > 420$  nm).

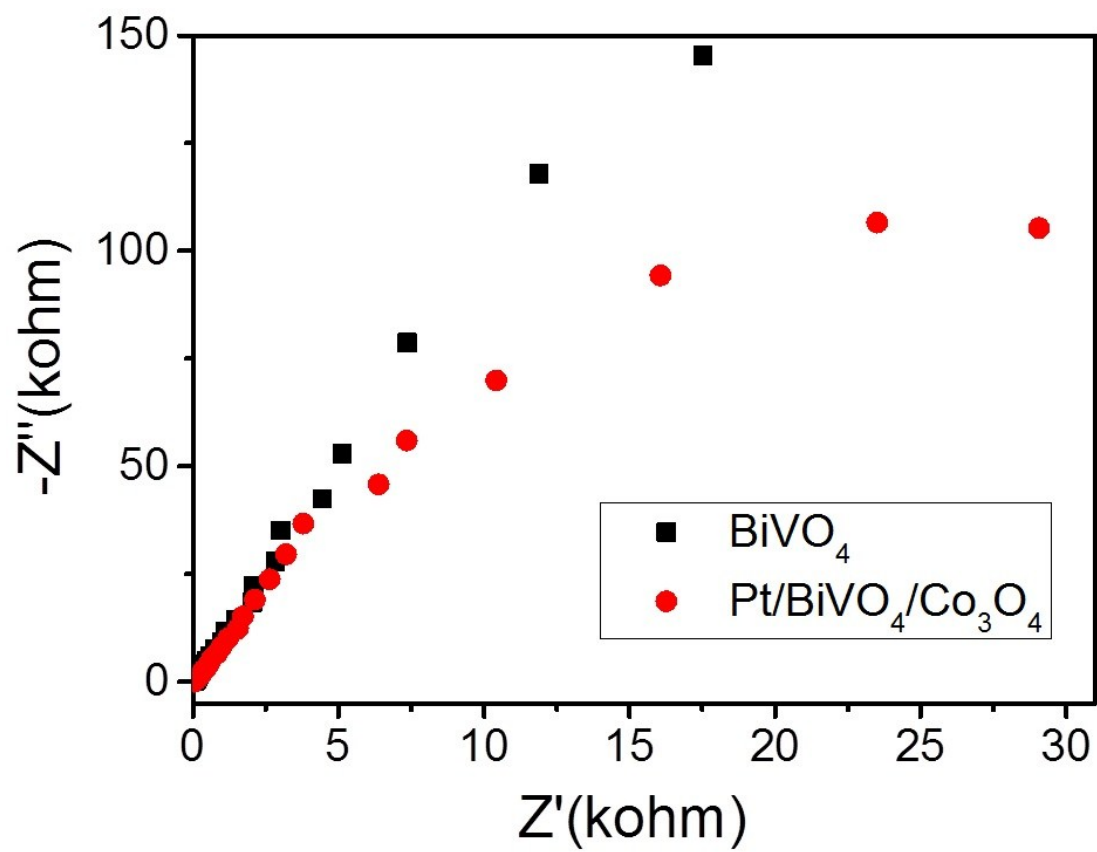

**Fig. S6.** Electrochemical impedance spectra of  $\text{BiVO}_4$  and  $\text{Pt/BiVO}_4/\text{Co}_3\text{O}_4$ .

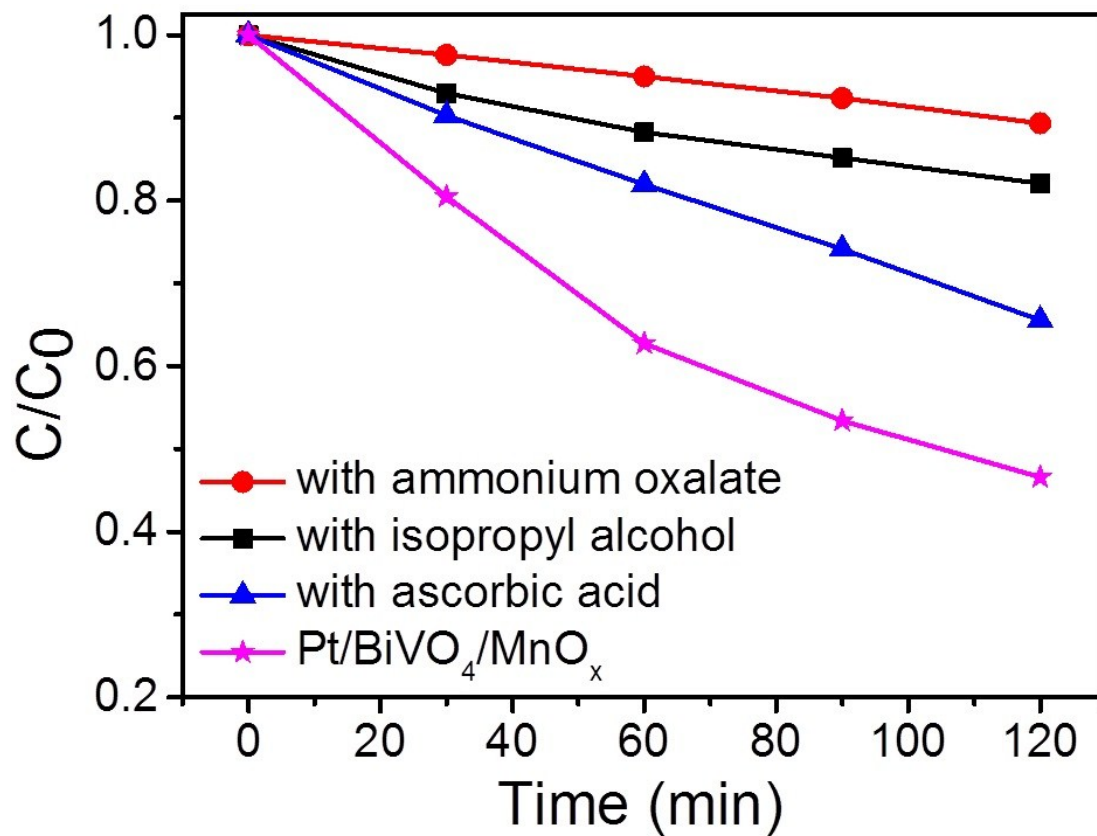

**Fig. S7.** Effect of scavengers on photocatalytic degradation of CBZ over Pt/BiVO<sub>4</sub>/MnO<sub>x</sub> photocatalyst. Reaction conditions: 100 mL CBZ solution with initial concentration of 10 mg/L, scavenger concentration 50 mmol/L, catalyst dosage 1 g/L, the contents of the deposited Pt and MnO<sub>x</sub> are 0.2 wt% and 0.1 wt% respectively and 300 W Xe lamp ( $\lambda > 420$  nm), top irradiation.



Table S1 HPLC-MS information about main fragment ions of identified degradation intermediates of CBZ by Pt/BiVO<sub>4</sub>/Co<sub>3</sub>O<sub>4</sub> and BiVO<sub>4</sub> photocatalysts.

| Product | Compounds                                                                           | RT/min | ESI(+)MS1<br>m/z | ESI(+)MS2<br>m/z | Pt/BiVO <sub>4</sub> /Co <sub>3</sub> O <sub>4</sub> | BiVO <sub>4</sub> |
|---------|-------------------------------------------------------------------------------------|--------|------------------|------------------|------------------------------------------------------|-------------------|
| P1      | 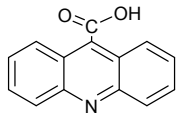   | 2.02   | 224              |                  | √                                                    |                   |
| P2      |    | 4.4    | 271              |                  | √                                                    |                   |
| P3      |    | 4.687  | 180              | 180              | √                                                    | √                 |
| P4      |   | 6.2    | 267              | 251,267,285      | √                                                    |                   |
| P5      |  | 6.2    | 307              | 251,267,307      | √                                                    |                   |
| P6      |  | 6.354  | 253              | 218,253,269      | √                                                    |                   |
| P7      |  | 6.7    | 253              |                  | √                                                    | √                 |
| P8      |  | 7.1    | 246              | 237,246,259      | √                                                    | √                 |

|     |                                                                                   |      |     |         |   |   |
|-----|-----------------------------------------------------------------------------------|------|-----|---------|---|---|
| P9  | 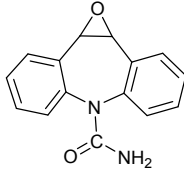 | 7.1  | 253 |         | √ |   |
| P10 |  | 7.1  | 196 |         | √ | √ |
| CBZ |  | 7.85 | 237 | 237,246 | √ | √ |

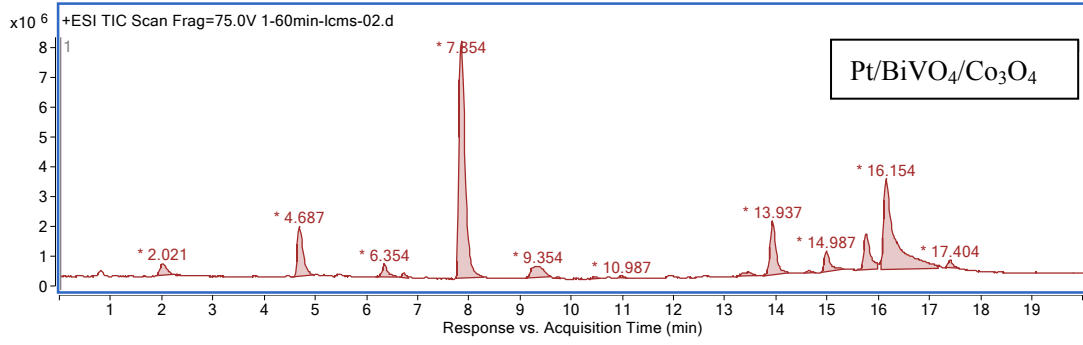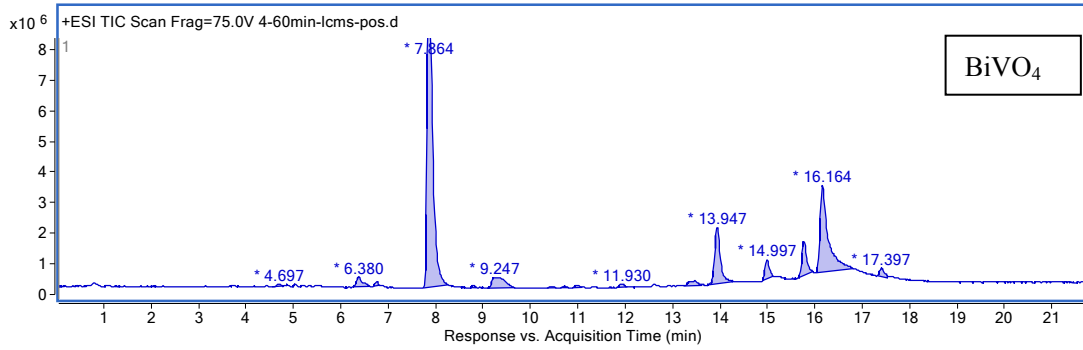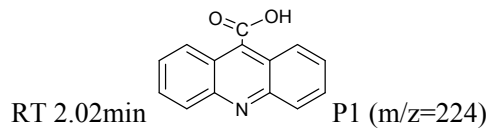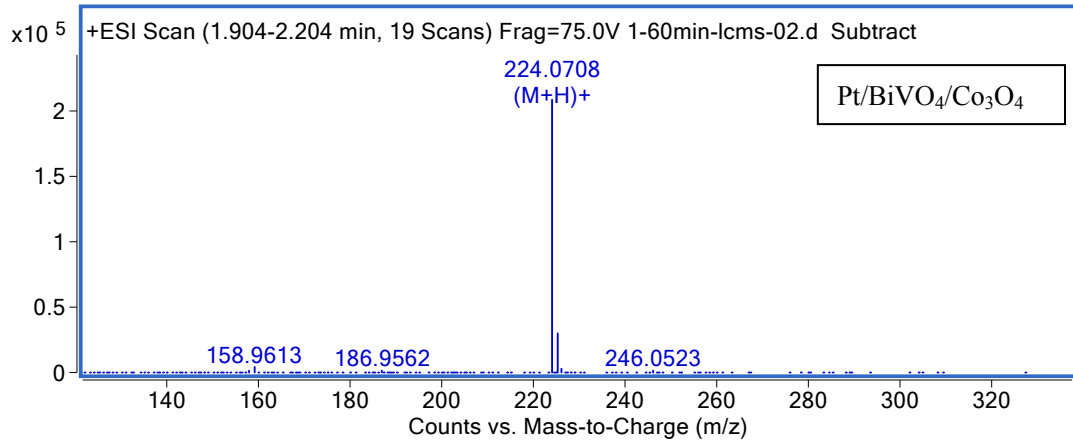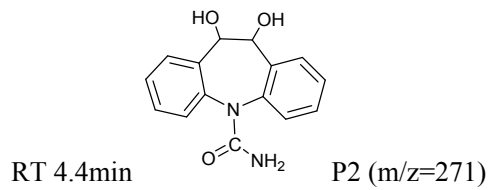

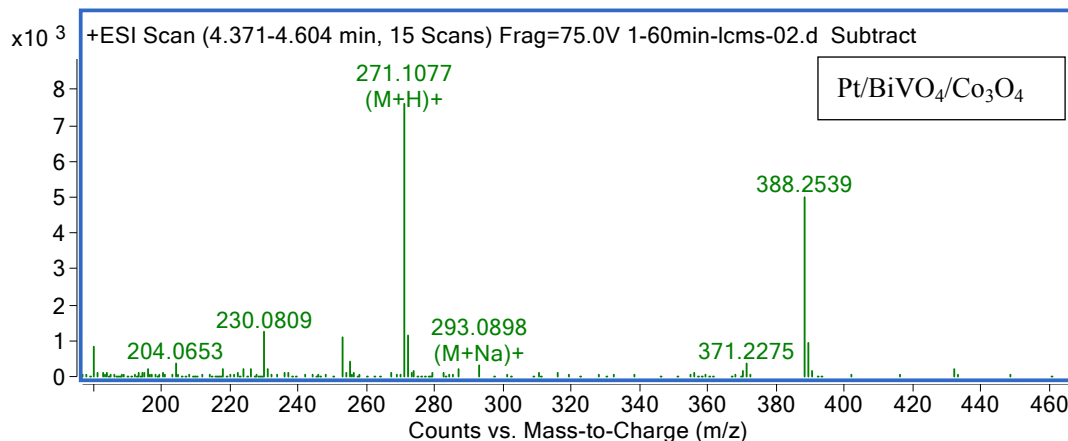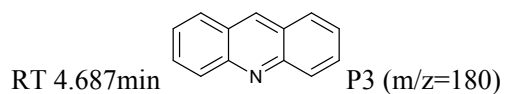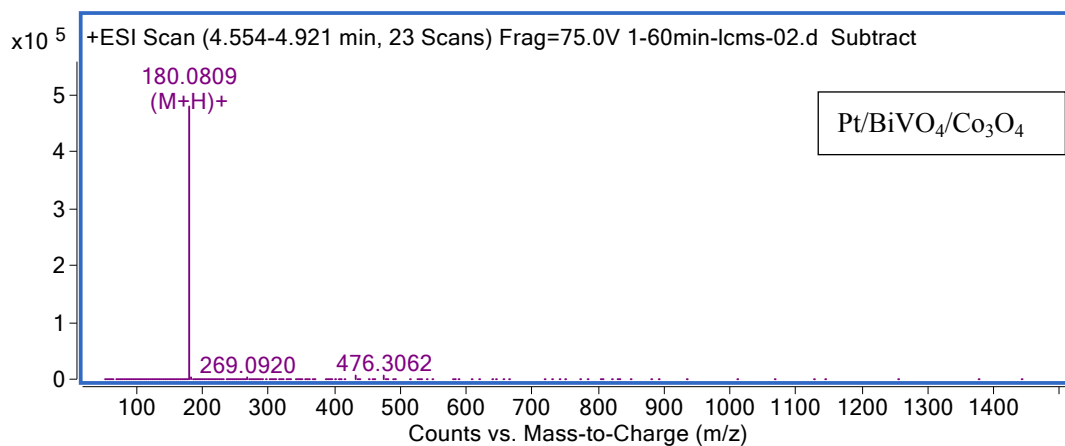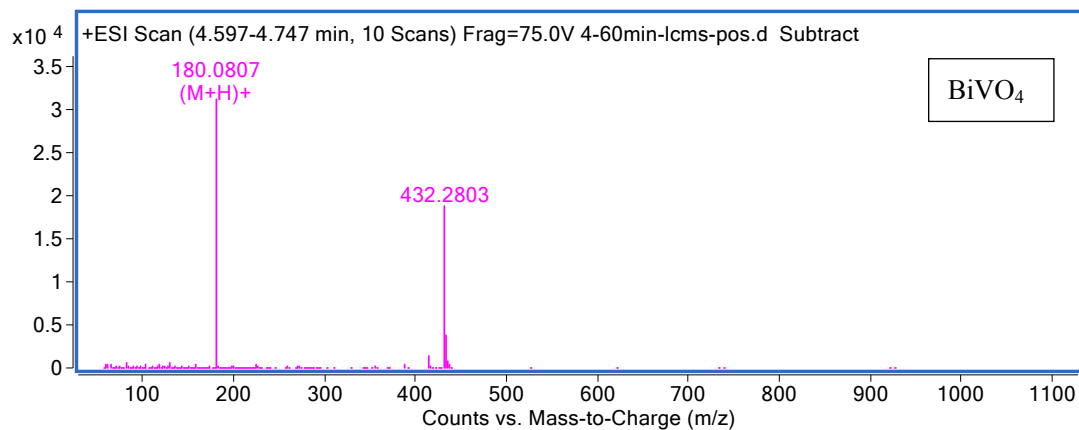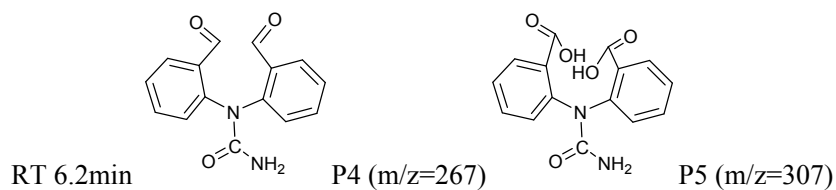

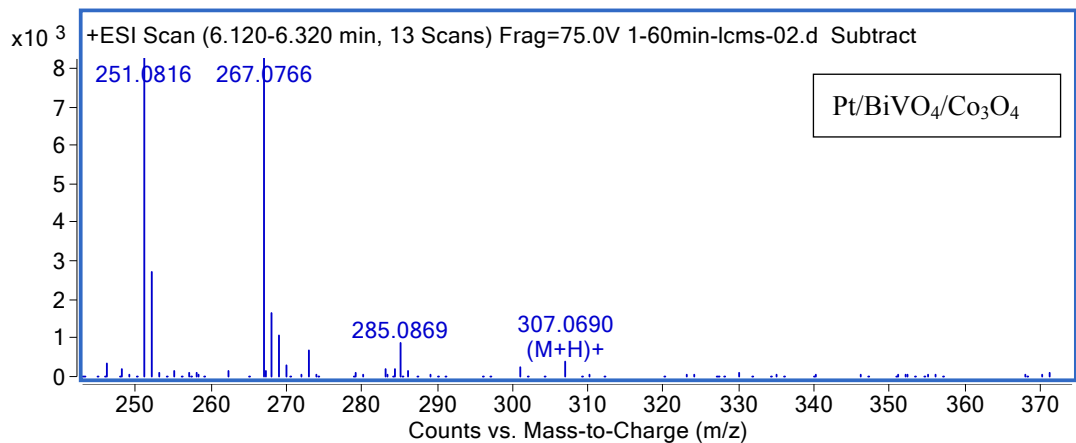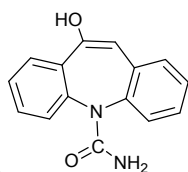

RT 6.354min

P6 (m/z=253)

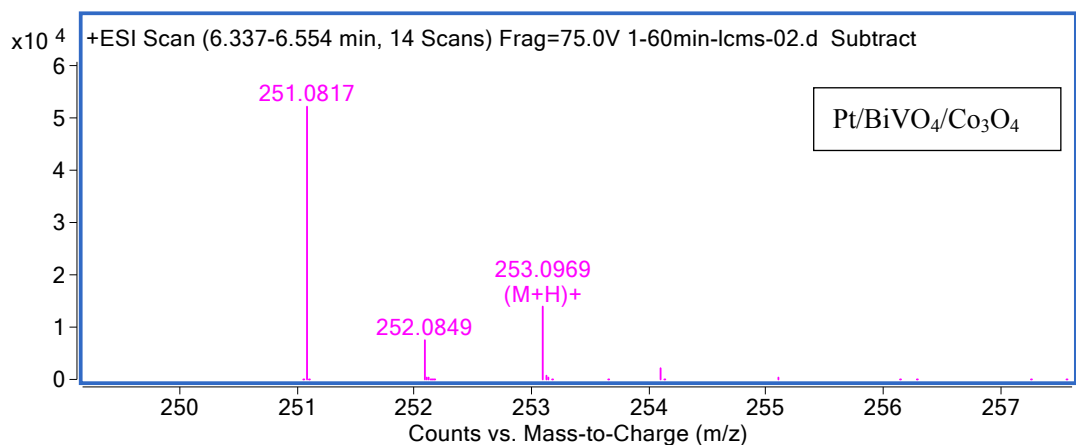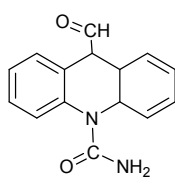

RT 6.7min

P7 (m/z=253)

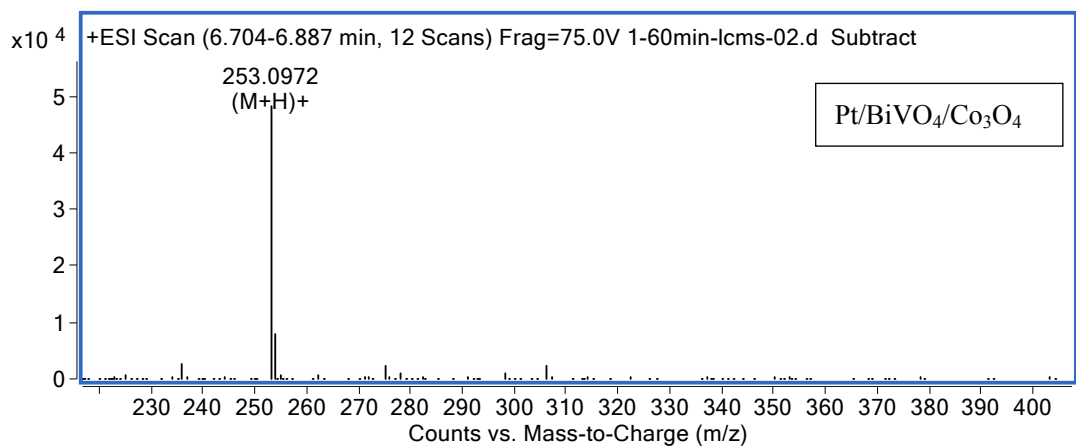

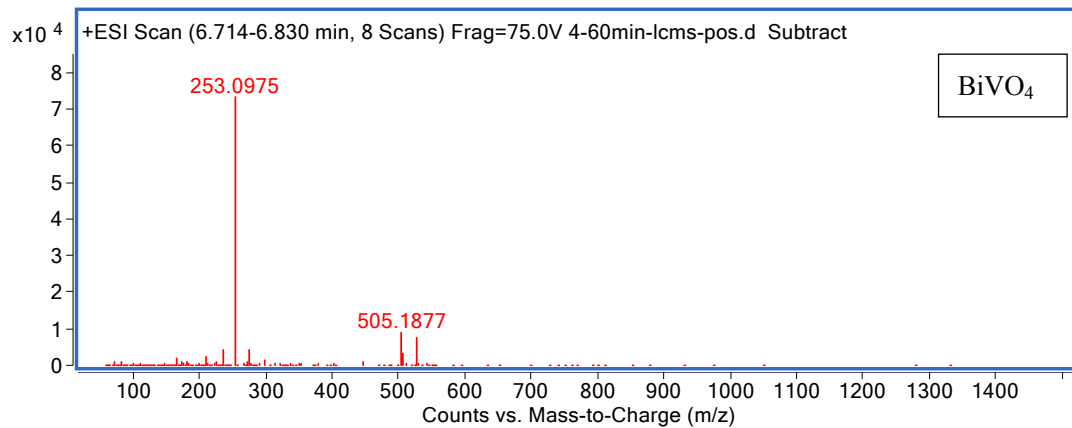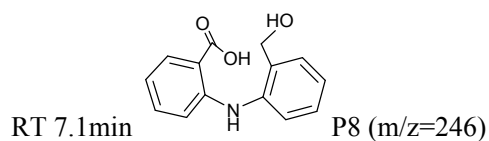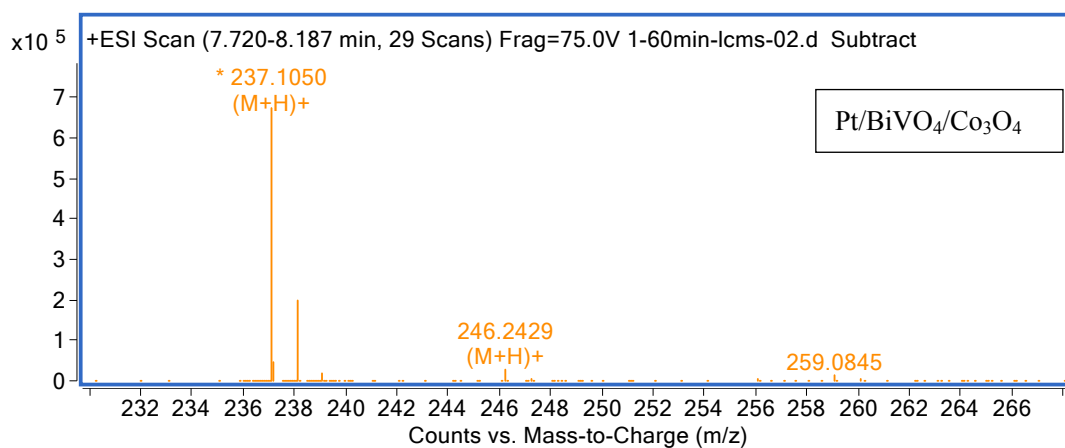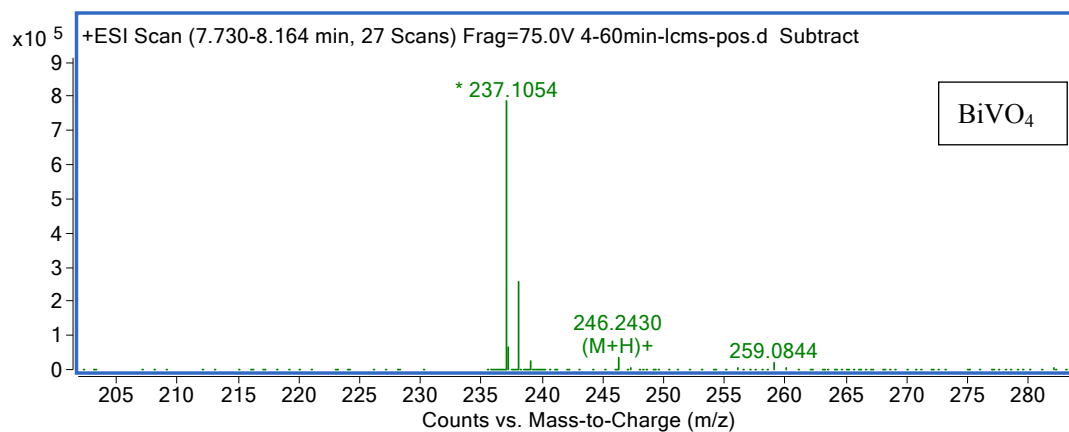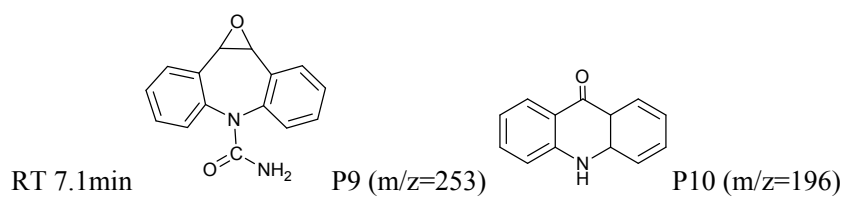

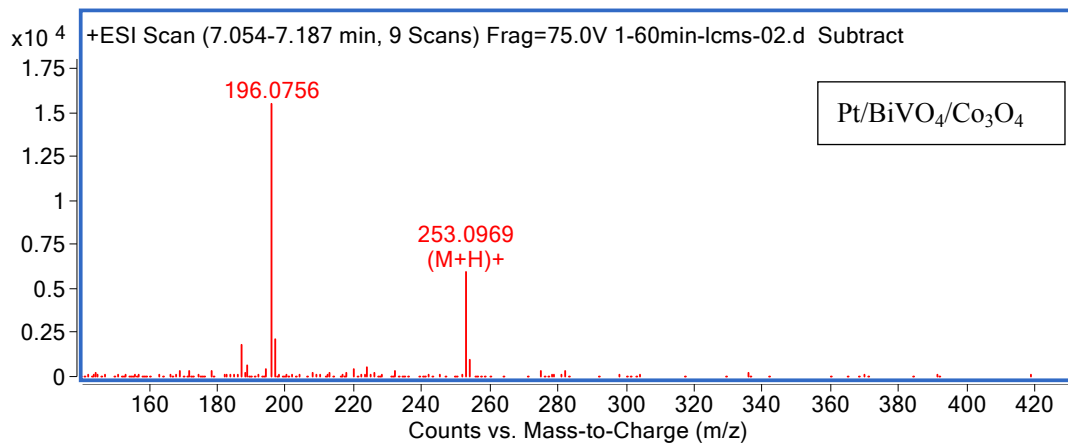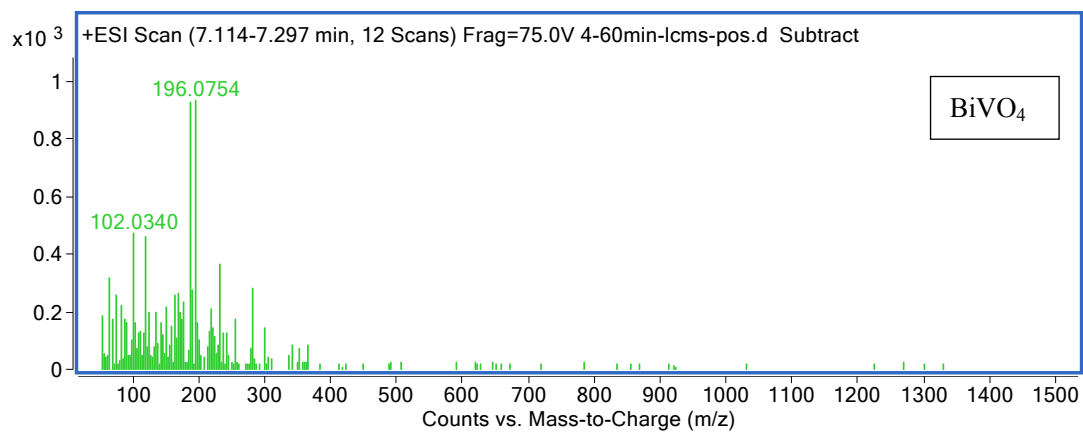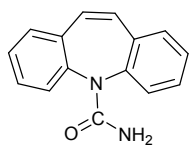

RT 7.85

CBZ (m/z=237)

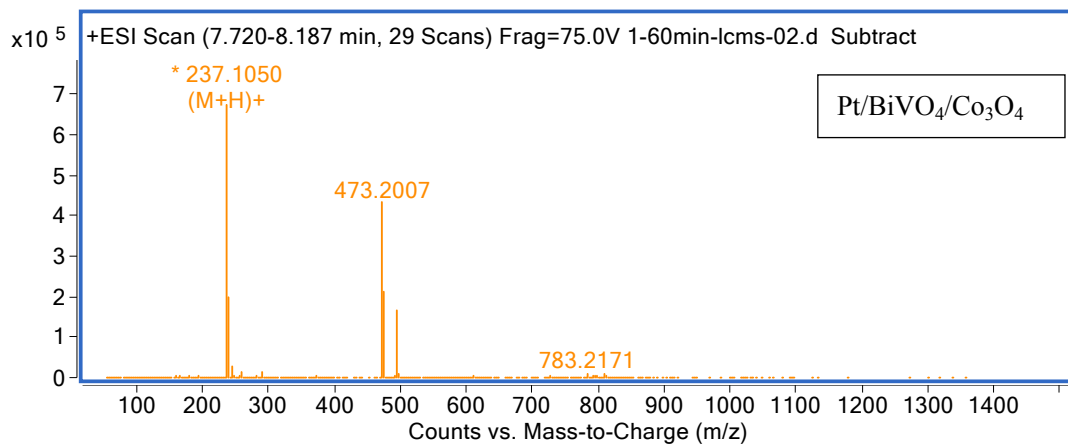

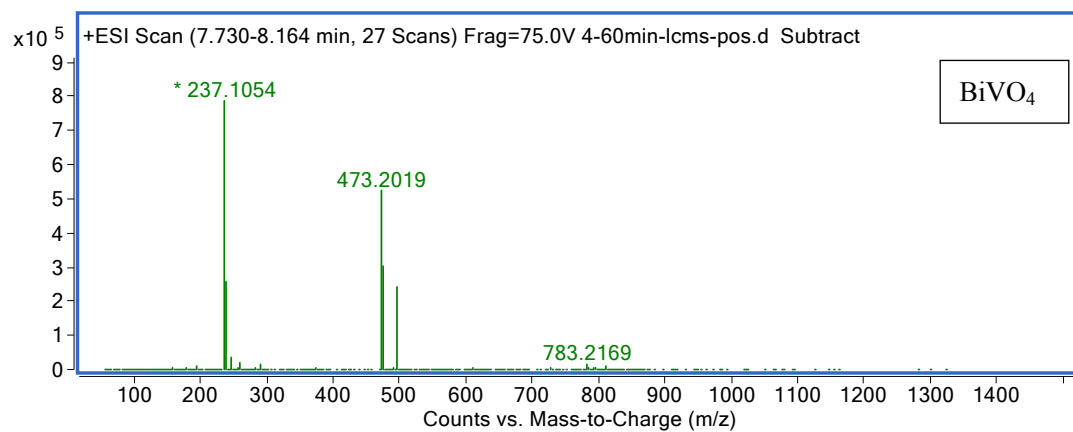

Fig. S8 Total ion current (TIC) of HPLC-MS analysis of the intermediates for CBZ degradation by Pt/BiVO<sub>4</sub>/Co<sub>3</sub>O<sub>4</sub> and BiVO<sub>4</sub> (reaction time 60 min) and the mass spectra of the detected intermediates.
